# Supplementary material for: Selective Subnormal IgG1 in 54 Adult Index Patients with Frequent or Severe Bacterial Respiratory Tract Infections
Source: Hindawi journal article supplement (doi:10.1155/2016/1405950), 2016-01-01
Supplement: f1 [file 1405950.f1.pdf]

**Supplementary Table 1.** *Streptococcus pneumoniae* serotype-specific IgG test panels<sup>1</sup>

| No. of serotypes | Serotypes                                         |
|------------------|---------------------------------------------------|
| 6                | 1, 3, 14, 19, 23, 51                              |
| 7                | 4, 14, 19, 23, 26, 56, 68                         |
| 14               | 1, 3, 4, 8, 9, 12, 14, 19, 23, 26, 51, 56, 57, 68 |

<sup>1</sup>Serotype panels varied according to the year of diagnosis, physician choice, and insurance requirements,

**Supplementary Table 2.** HLA-A positivity in Alabama adults<sup>1</sup>

| Type | Selective subnormal IgG3 (n = 54) | Population controls (n) | Value of p <sup>2</sup> |
|------|-----------------------------------|-------------------------|-------------------------|
| A*01 | 37.0 (20)                         | 0.3397 (1,319)          | 0.6407                  |
| A*02 | 50.0 (27)                         | 0.5201 (1,310)          | 0.7748                  |
| A*03 | 18.5 (10)                         | 0.2739 (1,318)          | 0.1503                  |
| A*11 | 18.5 (10)                         | 0.1136 (1,320)          | 0.1081                  |
| A*23 | 3.7 (2)                           | 0.0375 (1,254)          | 0.6705                  |
| A*24 | 9.3 (5)                           | 0.1304 (1,265)          | 0.4164                  |
| A*25 | 1.9 (1)                           | 0.0297 (1,281)          | 0.5257                  |
| A*26 | 3.7 (2)                           | 0.0634 (1,278)          | 0.3325                  |
| A*28 | 0                                 | 0.0773 (1,320)          | 0.0142                  |
| A*29 | 9.3 (5)                           | 0.0620 (1,290)          | 0.3658                  |
| A*30 | 1.9 (1)                           | 0.0405 (1,308)          | 0.3577                  |
| A*31 | 5.6 (3)                           | 0.0350 (1,258)          | 0.3046                  |
| A*32 | 7.4 (4)                           | 0.0536 (1,232)          | 0.3381                  |
| A*33 | 3.7 (2)                           | 0.0176 (1,248)          | 0.2623                  |
| A*34 | 0                                 | 0.0044 (1,146)          | 0.7939                  |

<sup>1</sup>HLA, human leukocyte antigen. Results are displayed as % (n). Comparisons were made with Pearson's chi-square test or Fischer's exact test, as appropriate.

<sup>2</sup>These are nominal values of p. Bonferroni correction for 15 comparisons yielded a revised p for significance of <0.0033.
